# Supplementary material for: Validation of the French versions of the Hirschsprung’s disease and Anorectal malformations Quality of Life (HAQL) questionnaires for adolescents and adults
Source: Springer Nature journal article supplement (doi:10.1186/s12955-017-0599-7), 2017-01-01
Supplement: MOESM1 [file 12025980]

**Appendix for**

**Validation of the French versions of the Hirschsprung's disease and Anorectal malformations Quality of Life (HAQL) questionnaires for adolescents and adults.**

Corine Baayen<sup>a,b,\*</sup>, Fanny Feuillet<sup>a,b</sup>, Pauline Clermidi<sup>c</sup>, Célia Crétolle<sup>d,e</sup>, Sabine Sarnacki<sup>d,e</sup>, Guillaume Podevin<sup>d,f</sup>, Jean-Benoit Hardouin<sup>a</sup>

<sup>a</sup>EA 4275 SPHERE "methodS in Patient-centered outcomes & HEalth ResEarch", University of Nantes, Nantes, France

<sup>b</sup>Plateforme de Biométrie, Département Promotion de la Recherche Clinique, University Hospital of Nantes, Nantes, France

<sup>c</sup>Department of Pediatric surgery, University Hospital of Limoges, France

<sup>d</sup>National French Center of Expertise for Anorectal and Rare Pelvic Malformations, Hospital Necker, Paris, France; University Paris Descartes, Sorbonne Paris Cite, Paris, France; University Hospital of Nantes, Nantes, France

<sup>e</sup>Pediatric Surgery and Urology Department, AP-HP, Hospital Necker, Paris, France; University Paris Descartes, Sorbonne Paris Cite, Paris, France

<sup>f</sup>Department of Pediatric Surgery, University Hospital of Angers, Angers, France

\*Corresponding author. Université de Nantes, UFR des Sciences Pharmaceutiques, EA 4275 SPHERE " methodS in Patient-centered outcomes & HEalth ResEarch ", 1 rue Gaston Veil, BP 53508, 44035 Nantes Cedex 1, France. Tel.: +33 2 40 41 29 96; fax: +33 2 40 41 29 96. *E-mail address*: corine.baayen@univ-nantes.fr.

**Table A1. HAQL Adults - Multitrait-scaling analysis of original structure. Correlations between items and their corresponding dimension are given in boldface. Items not meeting divergent/convergent validity are given in gray.**

|                                            | Dim 1       | Dim 2       | Dim 3       | Dim 4       | Dim 5       | Dim 6       | Dim 7       | Dim 8       | Dim 9       | Dim 10      |
|--------------------------------------------|-------------|-------------|-------------|-------------|-------------|-------------|-------------|-------------|-------------|-------------|
| <b>Dimension 1 - Laxative Diet</b>         |             |             |             |             |             |             |             |             |             |             |
| Item 1                                     | <b>0.64</b> | 0.15        | -0.06       | 0.08        | 0.09        | 0.21        | 0.30        | 0.23        | 0.19        | 0.13        |
| Item 4                                     | <b>0.64</b> | 0.02        | -0.04       | 0.04        | 0.22        | 0.18        | 0.22        | 0.14        | 0.20        | 0.11        |
| <b>Dimension 2 - Constipative Diet</b>     |             |             |             |             |             |             |             |             |             |             |
| Item 2                                     | 0.14        | <b>0.44</b> | 0.41        | 0.41        | 0.05        | 0.33        | 0.37        | 0.23        | 0.20        | 0.15        |
| Item 3                                     | 0.02        | <b>0.44</b> | 0.38        | <i>0.53</i> | 0.08        | <i>0.48</i> | 0.43        | 0.28        | 0.41        | 0.22        |
| <b>Dimension 3 - Presence of Diarrhea</b>  |             |             |             |             |             |             |             |             |             |             |
| Item 29                                    | -0.01       | 0.47        | <b>0.61</b> | 0.40        | 0.03        | 0.23        | 0.32        | 0.10        | 0.30        | 0.10        |
| Item 30                                    | 0.08        | 0.44        | <b>0.61</b> | 0.46        | -0.08       | 0.47        | 0.50        | 0.30        | 0.38        | 0.34        |
| <b>Dimension 4 - Fecal Continence</b>      |             |             |             |             |             |             |             |             |             |             |
| Item 41                                    | -0.03       | 0.48        | 0.38        | <b>0.82</b> | 0.06        | 0.45        | 0.48        | 0.43        | 0.31        | 0.18        |
| Item 42                                    | 0.05        | 0.39        | 0.31        | <b>0.75</b> | -0.08       | 0.49        | 0.54        | 0.37        | 0.38        | 0.11        |
| Item 43                                    | -0.02       | 0.37        | 0.25        | <b>0.62</b> | -0.10       | 0.39        | 0.48        | 0.47        | 0.53        | 0.50        |
| Item 44                                    | 0.12        | 0.36        | 0.41        | <b>0.53</b> | 0.06        | 0.36        | 0.50        | 0.49        | 0.33        | 0.29        |
| Item 45                                    | -0.07       | 0.32        | 0.18        | <b>0.71</b> | 0.36        | 0.43        | 0.44        | 0.45        | 0.40        | 0.29        |
| Item 46                                    | 0.06        | <i>0.26</i> | <i>0.31</i> | <i>0.24</i> | -0.10       | 0.17        | 0.14        | -0.07       | 0.16        | 0.01        |
| Item 47                                    | 0.10        | 0.37        | 0.24        | <i>0.57</i> | -0.03       | <i>0.58</i> | 0.43        | 0.36        | 0.53        | 0.24        |
| Item 9                                     | 0.13        | <i>0.51</i> | <i>0.42</i> | <i>0.39</i> | 0.32        | <i>0.56</i> | <i>0.60</i> | <i>0.44</i> | <i>0.40</i> | 0.33        |
| <b>Dimension 5 - Urinary Continence</b>    |             |             |             |             |             |             |             |             |             |             |
| Item 5                                     | 0.09        | 0.09        | -0.05       | 0.10        | <b>0.85</b> | 0.33        | 0.25        | 0.28        | 0.12        | 0.14        |
| Item 6                                     | 0.09        | 0.11        | 0.04        | 0.20        | <b>0.80</b> | 0.24        | 0.30        | 0.39        | 0.23        | 0.30        |
| Item 7                                     | 0.14        | 0.05        | -0.10       | 0.05        | <b>0.85</b> | 0.23        | 0.22        | 0.29        | 0.19        | 0.15        |
| Item 8                                     | 0.13        | 0.08        | 0.06        | 0.06        | <b>0.68</b> | 0.30        | 0.30        | 0.21        | 0.23        | 0.14        |
| <b>Dimension 6 - Social Functioning</b>    |             |             |             |             |             |             |             |             |             |             |
| Item 49                                    | 0.21        | 0.49        | 0.20        | 0.64        | 0.38        | <b>0.71</b> | 0.64        | 0.53        | 0.50        | 0.41        |
| Item 50                                    | 0.12        | 0.43        | 0.30        | 0.56        | 0.23        | <b>0.86</b> | 0.74        | 0.67        | 0.63        | 0.48        |
| Item 51                                    | 0.19        | 0.42        | 0.37        | 0.55        | 0.26        | <b>0.81</b> | 0.74        | 0.66        | 0.55        | 0.42        |
| <b>Dimension 7 - Emotional Functioning</b> |             |             |             |             |             |             |             |             |             |             |
| Item 10                                    | 0.28        | 0.45        | 0.35        | 0.49        | 0.26        | 0.58        | <b>0.77</b> | 0.65        | 0.56        | 0.38        |
| Item 11                                    | 0.23        | 0.26        | 0.39        | 0.39        | 0.32        | 0.58        | <b>0.71</b> | 0.62        | 0.53        | 0.48        |
| Item 14                                    | 0.19        | 0.35        | 0.24        | 0.50        | 0.28        | 0.62        | <i>0.75</i> | <i>0.77</i> | 0.58        | 0.39        |
| Item 15                                    | 0.18        | 0.45        | 0.36        | 0.62        | 0.29        | 0.68        | <b>0.83</b> | 0.81        | 0.57        | 0.59        |
| Item 16                                    | 0.32        | 0.29        | 0.16        | 0.49        | 0.31        | 0.56        | <b>0.75</b> | 0.74        | 0.38        | 0.48        |
| Item 17                                    | 0.12        | 0.36        | 0.38        | 0.54        | 0.08        | 0.60        | <b>0.65</b> | 0.58        | 0.51        | 0.23        |
| Item 48                                    | 0.21        | 0.53        | 0.50        | <i>0.72</i> | 0.12        | <i>0.70</i> | <b>0.62</b> | 0.53        | 0.61        | 0.48        |
| <b>Dimension 8 - Body Image</b>            |             |             |             |             |             |             |             |             |             |             |
| Item 12                                    | 0.07        | 0.30        | 0.24        | 0.60        | 0.29        | 0.71        | <i>0.80</i> | <b>0.73</b> | 0.50        | 0.55        |
| Item 13                                    | 0.30        | 0.27        | 0.15        | 0.42        | 0.32        | 0.56        | <i>0.76</i> | <b>0.73</b> | 0.54        | 0.65        |
| <b>Dimension 9 - Physical symptoms</b>     |             |             |             |             |             |             |             |             |             |             |
| Item 32                                    | 0.29        | 0.29        | 0.27        | 0.33        | 0.46        | 0.43        | 0.39        | 0.36        | <b>0.63</b> | 0.35        |
| Item 33                                    | 0.20        | 0.14        | 0.16        | 0.49        | 0.31        | 0.47        | 0.57        | 0.46        | <b>0.68</b> | 0.51        |
| Item 34                                    | -0.02       | 0.20        | 0.04        | 0.29        | 0.00        | 0.15        | <i>0.35</i> | <i>0.34</i> | <b>0.32</b> | 0.29        |
| Item 35                                    | 0.18        | 0.11        | 0.07        | 0.40        | 0.44        | 0.43        | 0.52        | 0.49        | <b>0.65</b> | 0.51        |
| Item 36                                    | 0.22        | 0.24        | 0.30        | 0.48        | -0.04       | 0.59        | <i>0.68</i> | 0.59        | <b>0.64</b> | 0.52        |
| Item 37                                    | 0.05        | 0.39        | 0.28        | 0.40        | 0.27        | 0.44        | 0.43        | 0.29        | <b>0.60</b> | 0.15        |
| Item 38                                    | 0.13        | 0.37        | 0.15        | 0.29        | -0.13       | 0.43        | 0.28        | 0.29        | <b>0.52</b> | 0.50        |
| Item 39                                    | 0.00        | 0.34        | <i>0.58</i> | 0.31        | -0.11       | 0.41        | 0.44        | 0.27        | <b>0.50</b> | 0.15        |
| Item 40                                    | 0.13        | 0.33        | 0.50        | 0.39        | 0.08        | 0.38        | 0.39        | 0.29        | <b>0.64</b> | 0.33        |
| <b>Dimension 10 - Sexual functioning</b>   |             |             |             |             |             |             |             |             |             |             |
| Item 18                                    | 0.03        | 0.19        | 0.21        | 0.37        | 0.25        | 0.49        | 0.49        | 0.62        | 0.52        | <b>0.91</b> |
| Item 19                                    | 0.19        | 0.24        | 0.25        | 0.36        | 0.16        | 0.46        | 0.56        | 0.65        | 0.53        | <b>0.91</b> |

**Table A2. HAQL Adolescents - Multitrait-scaling analysis of original structure. Correlations between items and their corresponding dimension are given in boldface. Items not meeting divergent/convergent validity are given in gray.**

|                                            | Dim 1       | Dim 2       | Dim 3       | Dim 4       | Dim 5       | Dim 6       | Dim 7       | Dim 8       | Dim 9       |
|--------------------------------------------|-------------|-------------|-------------|-------------|-------------|-------------|-------------|-------------|-------------|
| <b>Dimension 1 - Laxative Diet</b>         |             |             |             |             |             |             |             |             |             |
| Item 1                                     | <b>0.48</b> | 0.27        | 0.37        | 0.40        | 0.26        | 0.42        | 0.42        | 0.35        | 0.41        |
| Item 4                                     | <i>0.48</i> | 0.19        | 0.24        | 0.45        | <i>0.65</i> | <i>0.58</i> | <i>0.57</i> | <i>0.73</i> | 0.46        |
| <b>Dimension 2 - Constipative Diet</b>     |             |             |             |             |             |             |             |             |             |
| Item 2                                     | 0.24        | <b>0.49</b> | <i>0.74</i> | 0.26        | 0.21        | 0.17        | 0.36        | 0.39        | 0.32        |
| Item 3                                     | 0.23        | <b>0.49</b> | <i>0.73</i> | 0.44        | 0.41        | 0.44        | <i>0.55</i> | 0.32        | 0.28        |
| <b>Dimension 3 - Presence of Diarrhea</b>  |             |             |             |             |             |             |             |             |             |
| Item 26                                    | 0.31        | <i>0.82</i> | <b>0.77</b> | 0.38        | 0.34        | 0.24        | 0.44        | 0.24        | 0.32        |
| Item 27                                    | 0.33        | 0.73        | <b>0.77</b> | 0.27        | 0.31        | 0.22        | 0.46        | 0.34        | 0.21        |
| <b>Dimension 4 - Fecal Continence</b>      |             |             |             |             |             |             |             |             |             |
| Item 38                                    | 0.24        | 0.06        | 0.06        | <b>0.65</b> | 0.25        | 0.33        | 0.54        | 0.37        | 0.43        |
| Item 39                                    | 0.28        | 0.15        | 0.10        | <b>0.77</b> | 0.24        | 0.46        | 0.65        | 0.34        | 0.63        |
| Item 40                                    | 0.25        | 0.35        | 0.18        | <i>0.54</i> | 0.45        | 0.39        | <i>0.55</i> | 0.36        | <i>0.66</i> |
| Item 41                                    | 0.39        | 0.49        | 0.33        | <i>0.59</i> | 0.50        | <i>0.68</i> | <i>0.66</i> | 0.32        | 0.45        |
| Item 42                                    | 0.32        | 0.29        | 0.30        | <b>0.66</b> | 0.30        | 0.57        | 0.57        | 0.31        | 0.51        |
| Item 43                                    | 0.50        | 0.39        | 0.20        | <i>0.56</i> | <i>0.61</i> | <i>0.86</i> | <i>0.61</i> | <i>0.62</i> | 0.55        |
| Item 44                                    | 0.52        | 0.30        | 0.26        | <i>0.68</i> | 0.52        | <i>0.70</i> | 0.60        | 0.44        | 0.46        |
| Item 9                                     | <i>0.46</i> | <i>0.41</i> | <i>0.58</i> | <b>0.33</b> | 0.28        | <i>0.42</i> | <i>0.58</i> | <i>0.41</i> | 0.31        |
| <b>Dimension 5 - Urinary Continence</b>    |             |             |             |             |             |             |             |             |             |
| Item 5                                     | 0.40        | 0.43        | 0.37        | 0.48        | <b>0.68</b> | 0.61        | 0.53        | 0.59        | 0.48        |
| Item 6                                     | 0.55        | 0.25        | 0.18        | 0.43        | <b>0.83</b> | 0.76        | 0.62        | 0.80        | 0.37        |
| Item 7                                     | 0.16        | 0.22        | 0.15        | 0.23        | <i>0.38</i> | 0.37        | 0.33        | <i>0.42</i> | 0.18        |
| Item 8                                     | 0.65        | 0.22        | 0.36        | 0.53        | <i>0.67</i> | <i>0.77</i> | <i>0.68</i> | 0.61        | 0.39        |
| <b>Dimension 6 - Social Functioning</b>    |             |             |             |             |             |             |             |             |             |
| Item 46                                    | <i>0.66</i> | 0.24        | 0.35        | 0.59        | <i>0.74</i> | <b>0.65</b> | <i>0.72</i> | <i>0.67</i> | 0.54        |
| Item 47                                    | 0.61        | 0.25        | 0.17        | 0.54        | <i>0.78</i> | <b>0.64</b> | <i>0.69</i> | <i>0.82</i> | 0.51        |
| Item 48                                    | 0.66        | 0.14        | 0.22        | 0.61        | <i>0.80</i> | <b>0.73</b> | <i>0.78</i> | 0.73        | 0.50        |
| Item 17                                    | -0.01       | <i>0.30</i> | 0.02        | <i>0.25</i> | 0.03        | <b>0.21</b> | <i>0.25</i> | 0.07        | 0.07        |
| Item 18                                    | 0.03        | <i>0.38</i> | 0.06        | <i>0.52</i> | 0.17        | <b>0.27</b> | <i>0.35</i> | 0.08        | 0.19        |
| <b>Dimension 7 - Emotional Functioning</b> |             |             |             |             |             |             |             |             |             |
| Item 10                                    | 0.62        | 0.31        | 0.29        | 0.60        | <i>0.76</i> | <i>0.87</i> | <b>0.63</b> | <i>0.68</i> | 0.49        |
| Item 11                                    | 0.49        | 0.55        | 0.44        | 0.79        | 0.59        | 0.69        | <b>0.91</b> | 0.74        | 0.58        |
| Item 14                                    | 0.41        | 0.41        | 0.34        | 0.69        | 0.57        | 0.64        | <b>0.71</b> | 0.62        | 0.56        |
| Item 15                                    | 0.54        | 0.50        | 0.46        | 0.68        | 0.59        | 0.74        | <b>0.84</b> | 0.76        | 0.51        |
| Item 16                                    | 0.41        | <i>0.66</i> | <i>0.51</i> | 0.48        | <i>0.62</i> | <i>0.51</i> | <b>0.50</b> | <i>0.53</i> | 0.31        |
| Item 45                                    | 0.40        | 0.35        | 0.35        | <i>0.80</i> | 0.29        | 0.57        | <b>0.66</b> | 0.53        | 0.51        |
| <b>Dimension 8 - Body Image</b>            |             |             |             |             |             |             |             |             |             |
| Item 12                                    | 0.51        | 0.23        | 0.13        | 0.54        | <i>0.84</i> | <i>0.77</i> | <i>0.68</i> | <b>0.62</b> | 0.42        |
| Item 13                                    | <i>0.63</i> | 0.48        | 0.38        | 0.49        | 0.54        | 0.54        | <i>0.76</i> | <b>0.62</b> | 0.47        |
| <b>Dimension 9 - Physical symptoms</b>     |             |             |             |             |             |             |             |             |             |
| Item 29                                    | 0.45        | 0.01        | 0.02        | 0.40        | 0.15        | 0.30        | 0.33        | 0.29        | <b>0.48</b> |
| Item 30                                    | 0.32        | -0.06       | -0.08       | 0.42        | 0.28        | 0.28        | 0.32        | 0.25        | <b>0.57</b> |
| Item 31                                    | 0.26        | 0.19        | 0.02        | <i>0.59</i> | 0.28        | <i>0.41</i> | <i>0.52</i> | <i>0.40</i> | <b>0.33</b> |
| Item 32                                    | 0.62        | 0.15        | 0.07        | <i>0.78</i> | 0.43        | 0.66        | <i>0.68</i> | 0.55        | <b>0.66</b> |
| Item 33                                    | 0.18        | 0.26        | 0.32        | 0.27        | 0.08        | 0.13        | 0.21        | 0.09        | <b>0.45</b> |
| Item 34                                    | 0.24        | <i>0.48</i> | <i>0.51</i> | 0.29        | 0.31        | 0.15        | 0.35        | 0.18        | <b>0.42</b> |
| Item 35                                    | 0.25        | 0.15        | 0.09        | 0.40        | 0.30        | 0.28        | 0.33        | 0.24        | <b>0.54</b> |
| Item 36                                    | 0.21        | 0.43        | 0.34        | 0.38        | 0.30        | 0.29        | 0.36        | 0.14        | <b>0.44</b> |
| Item 37                                    | 0.26        | 0.16        | 0.21        | 0.44        | 0.40        | 0.31        | 0.38        | 0.31        | <b>0.63</b> |

**Table A3. Proposed HAQL structures for adults and adolescents**

| HAQL dimensions                         | Adults          |                              | Adolescents     |                           |
|-----------------------------------------|-----------------|------------------------------|-----------------|---------------------------|
|                                         | Number of items | Items                        | Number of items | Items                     |
| <b>Overall scale</b>                    | <b>39</b>       |                              | <b>36</b>       |                           |
| 1- Laxative Diet                        | 2               | 1,4                          | 2               | 1,4                       |
| 2- Presence of Diarrhea                 | 4               | 2,3,29,30                    | 4               | 2,3,26,27                 |
| 3- Fecal Continence                     | 6               | 41,42,43,44,45,47            | 6               | 38,39,40,41,42,44         |
| 4- Urinary Continence                   | 4               | 5,6,7,8                      | 4               | 5,6,7,8                   |
| 5- Social Functioning                   | 3               | 49,50,51                     | 3               | 46,47,48                  |
| 6- Emotional Functioning and Body Image | 10              | 9,10,11,12,13,14,15,16,17,48 | 9               | 9,10,11,12,13,14,15,16,45 |
| 7- Physical symptoms                    | 8               | 32,33,35,36,37,38,39,40      | 8               | 29,30,32,33,34,35,36,37   |
| 8- Sexual functioning                   | 2               | 18,19                        | -               | -                         |

**Table A4. List of items of the HAQL for adults and adolescents grouped by dimension**

| HAQL dimensions                         | Item general meaning                                       | Item number |             |
|-----------------------------------------|------------------------------------------------------------|-------------|-------------|
|                                         |                                                            | Adults      | Adolescents |
| 1- Laxative Diet                        | Eating special food on purpose to get thin stools          | 1           | 1           |
|                                         | Avoid eating special food to maintain thin stools          | 4           | 4           |
| 2- Presence of Diarrhea                 | Eating special food on purpose to get thick stools         | 2           | 2           |
|                                         | Avoid eating special food to maintain thick stools         | 3           | 3           |
|                                         | Thin stools                                                | 29          | 26          |
|                                         | More than four times a day thin stools                     | 30          | 27          |
| 3- Fecal Continence                     | Loss of feces before reaching the toilet                   | 41          | 38          |
|                                         | Soiling at daytime                                         | 42          | 39          |
|                                         | Soiling at nighttime                                       | 43          | 40          |
|                                         | Loss of feces at nighttime                                 | 44          | 41          |
|                                         | Loss of feces during physical activity                     | 45          | 42          |
|                                         | Loss of feces during coughing or sneezing                  | 47          | 44          |
| 4- Urinary Continence                   | Loss of urine before reaching the toilet                   | 5           | 5           |
|                                         | Loss of urine during physical activity                     | 6           | 6           |
|                                         | Loss of urine during emotional moments                     | 7           | 7           |
|                                         | Loss of urine during coughing or sneezing                  | 8           | 8           |
| 5- Social Functioning                   | Daily activities                                           | 49          | 46          |
|                                         | Social activities                                          | 50          | 47          |
|                                         | Staying the night elsewhere                                | 51          | -           |
|                                         | Play sports                                                | -           | 48          |
| 6- Emotional Functioning and Body Image | Important to be in neighborhood of a toilet                | 9           | 9           |
|                                         | Feeling embarrassed                                        | 10          | -           |
|                                         | Being ashamed of leaving the classroom to go to the toilet | -           | 10          |
|                                         | Feeling uncertain                                          | 15          | -           |
|                                         | Feeling worried for the future                             | 11          | -           |
|                                         | Feeling that you are teased more than other kids           | -           | 11          |
|                                         | Feeling embarrassed                                        | 14          | 14          |
|                                         | Feeling different                                          | 16          | 15          |
|                                         | Feeling less appreciated by others                         | 17          | 16          |
|                                         | Feeling afraid that others will smell your feces           | 48          | 45          |
| Feeling less attractive                 | 12                                                         | 12          |             |
| Feeling dissatisfied with your body     | 13                                                         | 13          |             |
| 7- Physical symptoms                    | Feeling swollen (abdomen)                                  | 32          | 29          |
|                                         | Feeling no urge while bowels are full of feces             | 33          | 30          |
|                                         | Difficulty to loose feces                                  | 35          | 32          |
|                                         | Difficulty to discriminate between flatulence or feces     | 36          | 33          |
|                                         | Being flatulent                                            | 37          | 34          |
|                                         | Difficult to let a flatus                                  | 38          | 35          |
|                                         | Having bowel movements                                     | 39          | 36          |
| Having abdominal pain                   | 40                                                         | 37          |             |
| 8 - Sexual functioning                  | Interest in sex                                            | 18          | -           |
|                                         | Sexual activity                                            | 19          | -           |

**Table A5. Concurrent validity: correlations between the dimensions of the HAQL for adults (proposed structure) and the WHOQOL-BREF questionnaire (significant results are given in boldface)**

| HAQL dimensions                         | WHOQOL-BREF dimensions            |                                   |                                   |                                   |
|-----------------------------------------|-----------------------------------|-----------------------------------|-----------------------------------|-----------------------------------|
|                                         | Physical health                   | Psychological health              | Social relationship               | Environment                       |
| Overall scale                           | <b>0.72</b><br><b>p&lt;0.0001</b> | <b>0.67</b><br><b>p&lt;0.0001</b> | <b>0.56</b><br><b>p&lt;0.0001</b> | <b>0.57</b><br><b>p&lt;0.0001</b> |
| 1- Laxative Diet                        | <b>0.27</b><br><b>p=0.0280</b>    | 0.11<br>p=0.39                    | 0.21<br>p=0.10                    | 0.14<br>p=0.25                    |
| 2- Presence of Diarrhea                 | <b>0.43</b><br><b>p=0.0007</b>    | <b>0.29</b><br><b>p=0.0340</b>    | <b>0.28</b><br><b>p= 0.0395</b>   | <b>0.34</b><br><b>p= 0.0108</b>   |
| 3- Fecal Continence                     | <b>0.45</b><br><b>p=0.0005</b>    | <b>0.31</b><br><b>p= 0.0217</b>   | <b>0.32</b><br><b>p= 0.0192</b>   | <b>0.27</b><br><b>p= 0.0415</b>   |
| 4- Urinary Continence                   | 0.10<br>p=0.44                    | 0.23<br>p= 0.07                   | 0.15<br>p= 0.25                   | 0.22<br>p= 0.07                   |
| 5- Social Functioning                   | <b>0.60</b><br><b>p&lt;0.0001</b> | <b>0.58</b><br><b>p&lt;0.0001</b> | <b>0.47</b><br><b>p= 0.0003</b>   | <b>0.57</b><br><b>p&lt;0.0001</b> |
| 6- Emotional Functioning and Body Image | <b>0.70</b><br><b>p&lt;0.0001</b> | <b>0.64</b><br><b>p&lt;0.0001</b> | <b>0.50</b><br><b>p&lt;0.0001</b> | <b>0.53</b><br><b>p&lt;0.0001</b> |
| 7- Physical symptoms                    | <b>0.66</b><br><b>p&lt;0.0001</b> | <b>0.55</b><br><b>p&lt;0.0001</b> | <b>0.47</b><br><b>p= 0.0004</b>   | <b>0.61</b><br><b>p&lt;0.0001</b> |
| 8- Sexual functioning                   | <b>0.49</b><br><b>P=0.0001</b>    | <b>0.49</b><br><b>p= 0.0002</b>   | <b>0.44</b><br><b>p= 0.0004</b>   | 0.25<br>p=0.05                    |

**Table A6. Concurrent validity: correlations between the dimensions of the HAQL for adolescents (proposed structure) and the VSPA questionnaire (significant results are given in boldface)**

| HAQL dimensions                         | VSP-Ae dimensions     |                                   |                                |                                         |                                |                                     |                 |                              |
|-----------------------------------------|-----------------------|-----------------------------------|--------------------------------|-----------------------------------------|--------------------------------|-------------------------------------|-----------------|------------------------------|
|                                         | Relations with family | Self esteem                       | Vitality                       | Relations with friends<br>Communication | Leisure                        | Psychological & Physical well being | School work     | Relations with medical staff |
| Overall scale                           | 0.15<br>p=0.39        | <b>0.70</b><br><b>p&lt;0.0001</b> | <b>0.43</b><br><b>p=0.0087</b> | <b>0.34</b><br><b>p=0.0409</b>          | <b>0.55</b><br><b>p=0.0005</b> | <b>0.63</b><br><b>p&lt;0.0001</b>   | 0.14<br>p=0.42  | -0.12<br>p=0.51              |
| 1- Laxative Diet                        | -0.05<br>p=0.77       | <b>0.44</b><br><b>p=0.0033</b>    | <b>0.35</b><br><b>p=0.0234</b> | 0.28<br>p=0.08                          | <b>0.42</b><br><b>p=0.0060</b> | <b>0.58</b><br><b>p&lt;0.0001</b>   | 0.10<br>p=0.54  | -0.03<br>p=0.84              |
| 2- Presence of Diarrhea                 | 0.13<br>p=0.43        | <b>0.44</b><br><b>p=0.0063</b>    | 0.26<br>p=0.11                 | 0.11<br>p=0.51                          | <b>0.40</b><br><b>p=0.0155</b> | 0.29<br>p=0.08                      | -0.02<br>p=0.90 | -0.05<br>p=0.77              |
| 3- Fecal Continence                     | 0.19<br>p=0.26        | <b>0.41</b><br><b>p=0.0125</b>    | <b>0.38</b><br><b>p=0.0209</b> | <b>0.34</b><br><b>p=0.0404</b>          | <b>0.34</b><br><b>p=0.0397</b> | <b>0.41</b><br><b>p=0.0112</b>      | 0.29<br>p=0.08  | -0.19<br>p=0.30              |
| 4- Urinary Continence                   | 0.11<br>p=0.49        | <b>0.46</b><br><b>p=0.0022</b>    | 0.22<br>p=0.17                 | 0.30<br>p=0.06                          | <b>0.44</b><br><b>p=0.0038</b> | <b>0.32</b><br><b>p=0.0354</b>      | -0.11<br>p=0.49 | 0.13<br>p=0.46               |
| 5- Social Functioning                   | 0.07<br>p=0.68        | <b>0.60</b><br><b>p&lt;0.0001</b> | 0.28<br>p=0.10                 | 0.27<br>p=0.11                          | <b>0.39</b><br><b>p=0.0173</b> | <b>0.52</b><br><b>p=0.0009</b>      | 0.16<br>p=0.36  | -0.11<br>p=0.56              |
| 6- Emotional Functioning and Body Image | 0.16<br>p=0.32        | <b>0.75</b><br><b>p&lt;0.0001</b> | <b>0.38</b><br><b>p=0.0137</b> | <b>0.44</b><br><b>p=0.0036</b>          | <b>0.56</b><br><b>p=0.0001</b> | <b>0.59</b><br><b>p&lt;0.0001</b>   | 0.23<br>p=0.14  | -0.19<br>p=0.25              |
| 7- Physical symptoms                    | 0.25<br>p=0.13        | <b>0.46</b><br><b>p=0.0040</b>    | <b>0.43</b><br><b>p=0.0084</b> | 0.32<br>p=0.06                          | <b>0.39</b><br><b>p=0.0156</b> | <b>0.59</b><br><b>p=0.0001</b>      | 0.14<br>p=0.42  | 0.17<br>p=0.34               |

**Table A7. HAQL Adults - Multitrait-scaling analysis of proposed structure. Correlations between items and their corresponding dimension are given in boldface. Items not meeting divergent/convergent validity are given in gray.**

|                                                           | Dim 1       | Dim 2       | Dim 3       | Dim 4       | Dim 5       | Dim 6       | Dim 7       | Dim 8       |
|-----------------------------------------------------------|-------------|-------------|-------------|-------------|-------------|-------------|-------------|-------------|
| <b>Dimension 1 - Laxative Diet</b>                        |             |             |             |             |             |             |             |             |
| Item 1                                                    | <b>0.64</b> | 0.14        | 0.04        | 0.09        | 0.21        | 0.27        | 0.20        | 0.13        |
| Item 4                                                    | <b>0.64</b> | -0.02       | 0.00        | 0.22        | 0.18        | 0.21        | 0.21        | 0.11        |
| <b>Dimension 2 - Presence of Diarrhea</b>                 |             |             |             |             |             |             |             |             |
| Item 2                                                    | 0.14        | <b>0.53</b> | 0.35        | 0.05        | 0.33        | 0.36        | 0.17        | 0.15        |
| Item 3                                                    | 0.02        | <b>0.52</b> | 0.45        | 0.05        | 0.46        | 0.43        | 0.40        | 0.22        |
| Item 29                                                   | 0.06        | <b>0.65</b> | 0.35        | 0.01        | 0.31        | 0.31        | 0.32        | 0.09        |
| Item 30                                                   | 0.08        | <b>0.58</b> | 0.37        | -0.08       | 0.47        | 0.48        | 0.40        | 0.34        |
| <b>Dimension 3 - Fecal Continence</b>                     |             |             |             |             |             |             |             |             |
| Item 41                                                   | -0.03       | 0.51        | <b>0.84</b> | 0.06        | 0.45        | 0.49        | 0.30        | 0.18        |
| Item 42                                                   | 0.05        | 0.43        | <b>0.71</b> | -0.08       | 0.49        | 0.52        | 0.36        | 0.11        |
| Item 43                                                   | -0.02       | 0.36        | <b>0.68</b> | -0.10       | 0.39        | 0.48        | 0.52        | 0.51        |
| Item 44                                                   | 0.12        | 0.44        | <b>0.55</b> | 0.05        | 0.36        | 0.50        | 0.33        | 0.31        |
| Item 45                                                   | -0.07       | 0.29        | <b>0.74</b> | 0.36        | 0.43        | 0.46        | 0.41        | 0.29        |
| Item 47                                                   | 0.10        | 0.37        | <b>0.58</b> | -0.03       | 0.58        | 0.43        | 0.52        | 0.24        |
| <b>Dimension 4 - Urinary Continence</b>                   |             |             |             |             |             |             |             |             |
| Item 5                                                    | 0.09        | 0.00        | 0.06        | <b>0.85</b> | 0.33        | 0.29        | 0.14        | 0.14        |
| Item 6                                                    | 0.09        | 0.08        | 0.19        | <b>0.80</b> | 0.24        | 0.34        | 0.23        | 0.30        |
| Item 7                                                    | 0.14        | -0.05       | 0.04        | <b>0.85</b> | 0.23        | 0.25        | 0.19        | 0.15        |
| Item 8                                                    | 0.13        | 0.06        | -0.01       | <b>0.68</b> | 0.30        | 0.31        | 0.25        | 0.14        |
| <b>Dimension 5 - Social Functioning</b>                   |             |             |             |             |             |             |             |             |
| Item 49                                                   | 0.21        | 0.45        | 0.58        | 0.38        | <b>0.71</b> | 0.65        | 0.51        | 0.41        |
| Item 50                                                   | 0.12        | 0.45        | 0.50        | 0.23        | <b>0.86</b> | 0.75        | 0.64        | 0.48        |
| Item 51                                                   | 0.19        | 0.49        | 0.49        | 0.26        | <b>0.81</b> | 0.75        | 0.57        | 0.42        |
| <b>Dimension 6 - Emotional Functioning and Body Image</b> |             |             |             |             |             |             |             |             |
| Item 9                                                    | 0.13        | 0.56        | 0.38        | 0.32        | 0.56        | <b>0.58</b> | 0.40        | 0.33        |
| Item 10                                                   | 0.28        | 0.45        | 0.38        | 0.26        | 0.58        | <b>0.79</b> | 0.55        | 0.38        |
| Item 11                                                   | 0.23        | 0.36        | 0.30        | 0.32        | 0.58        | <b>0.72</b> | 0.54        | 0.48        |
| Item 12                                                   | 0.07        | 0.30        | 0.60        | 0.29        | 0.71        | <b>0.80</b> | 0.49        | 0.55        |
| Item 13                                                   | 0.30        | 0.22        | 0.40        | 0.32        | 0.56        | <b>0.76</b> | 0.52        | 0.65        |
| Item 14                                                   | 0.19        | 0.28        | 0.46        | 0.28        | 0.62        | <b>0.77</b> | 0.58        | 0.39        |
| Item 15                                                   | 0.18        | 0.47        | 0.58        | 0.29        | 0.68        | <b>0.86</b> | 0.54        | 0.59        |
| Item 16                                                   | 0.32        | 0.25        | 0.48        | 0.31        | 0.56        | <b>0.77</b> | 0.37        | 0.48        |
| Item 17                                                   | 0.12        | 0.42        | 0.50        | 0.08        | 0.60        | <b>0.64</b> | 0.50        | 0.23        |
| Item 48                                                   | 0.20        | 0.60        | <i>0.69</i> | 0.13        | <i>0.69</i> | <b>0.62</b> | 0.59        | 0.48        |
| <b>Dimension 7 - Physical symptoms</b>                    |             |             |             |             |             |             |             |             |
| Item 32                                                   | 0.29        | 0.30        | 0.30        | 0.46        | 0.43        | 0.40        | <b>0.66</b> | 0.35        |
| Item 33                                                   | 0.20        | 0.17        | 0.48        | 0.31        | 0.47        | 0.56        | <b>0.66</b> | 0.51        |
| Item 35                                                   | 0.18        | 0.07        | 0.41        | 0.44        | 0.43        | 0.51        | <b>0.64</b> | 0.51        |
| Item 36                                                   | 0.22        | 0.30        | 0.45        | -0.04       | 0.59        | <i>0.67</i> | <b>0.61</b> | 0.52        |
| Item 37                                                   | 0.05        | 0.39        | 0.36        | 0.27        | 0.44        | 0.42        | <b>0.61</b> | 0.15        |
| Item 38                                                   | 0.13        | 0.30        | 0.26        | -0.13       | 0.43        | 0.30        | <b>0.52</b> | 0.50        |
| Item 39                                                   | 0.00        | 0.49        | 0.27        | -0.11       | 0.41        | 0.41        | <b>0.52</b> | 0.15        |
| Item 40                                                   | 0.13        | 0.46        | 0.36        | 0.08        | 0.38        | 0.38        | <b>0.64</b> | 0.33        |
| <b>Dimension 8 - Sexual functioning</b>                   |             |             |             |             |             |             |             |             |
| Item 18                                                   | 0.03        | 0.21        | 0.35        | 0.25        | 0.49        | 0.54        | 0.50        | <b>0.91</b> |
| Item 19                                                   | 0.19        | 0.27        | 0.34        | 0.16        | 0.46        | 0.59        | 0.51        | <b>0.91</b> |

**Table A8. HAQL Adolescents - Multitrait-scaling analysis of proposed structure. Correlations between items and their corresponding dimension are given in boldface. Items not meeting divergent/convergent validity are given in gray.**

|                                            | Dim 1       | Dim 2       | Dim 3       | Dim 4       | Dim 5       | Dim 6       | Dim 7       |
|--------------------------------------------|-------------|-------------|-------------|-------------|-------------|-------------|-------------|
| <b>Dimension 1 - Laxative Diet</b>         |             |             |             |             |             |             |             |
| Item 1                                     | <b>0.48</b> | 0.36        | 0.33        | 0.26        | 0.44        | 0.46        | 0.42        |
| Item 4                                     | <i>0.48</i> | 0.22        | 0.38        | <i>0.65</i> | <i>0.72</i> | <i>0.63</i> | 0.43        |
| <b>Dimension 2 - Presence of Diarrhea</b>  |             |             |             |             |             |             |             |
| Item 2                                     | 0.24        | <b>0.71</b> | 0.19        | 0.21        | 0.15        | 0.42        | 0.33        |
| Item 3                                     | 0.23        | <b>0.71</b> | 0.38        | 0.41        | 0.22        | 0.52        | 0.25        |
| Item 26                                    | 0.31        | <b>0.86</b> | 0.28        | 0.34        | 0.21        | 0.45        | 0.35        |
| Item 27                                    | 0.33        | <b>0.78</b> | 0.18        | 0.31        | 0.29        | 0.48        | 0.22        |
| <b>Dimension 3 - Fecal Continence</b>      |             |             |             |             |             |             |             |
| Item 38                                    | 0.24        | 0.06        | <b>0.67</b> | 0.25        | 0.32        | 0.52        | 0.34        |
| Item 39                                    | 0.28        | 0.13        | <b>0.78</b> | 0.24        | 0.38        | 0.61        | 0.55        |
| Item 40                                    | 0.25        | 0.26        | <i>0.58</i> | 0.45        | 0.35        | 0.50        | <i>0.62</i> |
| Item 41                                    | 0.39        | 0.42        | <b>0.60</b> | 0.50        | 0.44        | 0.57        | 0.41        |
| Item 42                                    | 0.32        | 0.31        | <b>0.65</b> | 0.30        | 0.48        | 0.54        | 0.48        |
| Item 44                                    | 0.52        | 0.29        | <b>0.60</b> | 0.51        | 0.59        | 0.60        | 0.45        |
| <b>Dimension 4 - Urinary Continence</b>    |             |             |             |             |             |             |             |
| Item 5                                     | 0.40        | 0.45        | 0.44        | <b>0.68</b> | 0.68        | 0.54        | 0.46        |
| Item 6                                     | 0.55        | 0.22        | 0.39        | <i>0.83</i> | <i>0.87</i> | 0.65        | 0.33        |
| Item 7                                     | 0.16        | 0.18        | 0.20        | <b>0.38</b> | 0.27        | 0.36        | 0.18        |
| Item 8                                     | 0.65        | 0.31        | 0.47        | <i>0.67</i> | <i>0.89</i> | 0.67        | 0.38        |
| <b>Dimension 5 - Social Functioning</b>    |             |             |             |             |             |             |             |
| Item 46                                    | 0.66        | 0.31        | 0.53        | 0.74        | <b>0.93</b> | 0.73        | 0.53        |
| Item 47                                    | 0.61        | 0.22        | 0.50        | 0.78        | <b>0.85</b> | 0.73        | 0.47        |
| Item 48                                    | 0.66        | 0.19        | 0.52        | 0.80        | <b>0.90</b> | 0.80        | 0.48        |
| <b>Dimension 6 - Emotional Functioning</b> |             |             |             |             |             |             |             |
| Item 9                                     | 0.46        | 0.52        | 0.33        | 0.28        | 0.40        | <b>0.56</b> | 0.31        |
| Item 10                                    | 0.62        | 0.31        | 0.51        | <i>0.76</i> | <i>0.91</i> | <i>0.68</i> | 0.47        |
| Item 11                                    | 0.49        | 0.50        | 0.75        | 0.59        | 0.66        | <b>0.88</b> | 0.52        |
| Item 12                                    | 0.53        | 0.20        | 0.53        | <i>0.83</i> | <i>0.84</i> | <i>0.69</i> | 0.45        |
| Item 13                                    | 0.64        | 0.43        | 0.42        | 0.54        | 0.60        | <b>0.77</b> | 0.42        |
| Item 14                                    | 0.42        | 0.38        | 0.68        | 0.57        | 0.64        | <b>0.70</b> | 0.53        |
| Item 15                                    | 0.55        | 0.50        | 0.59        | 0.59        | 0.68        | <b>0.88</b> | 0.46        |
| Item 16                                    | 0.41        | <i>0.61</i> | 0.43        | <i>0.63</i> | 0.35        | <i>0.53</i> | 0.30        |
| Item 45                                    | 0.40        | 0.35        | <i>0.75</i> | 0.29        | 0.49        | <i>0.69</i> | 0.43        |
| <b>Dimension 7 - Physical symptoms</b>     |             |             |             |             |             |             |             |
| Item 29                                    | 0.45        | 0.02        | 0.40        | 0.15        | 0.31        | 0.35        | <b>0.46</b> |
| Item 30                                    | 0.33        | -0.07       | 0.43        | 0.29        | 0.32        | 0.31        | <b>0.59</b> |
| Item 32                                    | 0.62        | 0.11        | <i>0.76</i> | 0.43        | 0.60        | <i>0.68</i> | <i>0.61</i> |
| Item 33                                    | 0.18        | 0.31        | 0.25        | 0.08        | 0.13        | 0.22        | <b>0.45</b> |
| Item 34                                    | 0.24        | <i>0.52</i> | 0.22        | 0.31        | 0.24        | 0.34        | <i>0.43</i> |
| Item 35                                    | 0.25        | 0.12        | 0.35        | 0.30        | 0.37        | 0.35        | <b>0.52</b> |
| Item 36                                    | 0.21        | 0.40        | 0.37        | 0.30        | 0.21        | 0.31        | <b>0.48</b> |
| Item 37                                    | 0.26        | 0.19        | 0.46        | 0.40        | 0.40        | 0.36        | <b>0.64</b> |
